# Supplementary material for: Association between Body Mass Index and Outcomes in Patients with Return of Spontaneous Circulation after Out-of-Hospital Cardiac Arrest: A Systematic Review and Meta-Analysis
Source: MDPI journal article supplement (doi:10.3390/ijerph18168389), 2021-08-08

**Table S1.** Comprehensive list presenting the search strategy.

| Embase           |                                                                                                                                                                                                                                                                                                                                                                                                                                                                           |         |
|------------------|---------------------------------------------------------------------------------------------------------------------------------------------------------------------------------------------------------------------------------------------------------------------------------------------------------------------------------------------------------------------------------------------------------------------------------------------------------------------------|---------|
| No.              | Searches                                                                                                                                                                                                                                                                                                                                                                                                                                                                  | Results |
| 1                | body mass index.ti,ab.                                                                                                                                                                                                                                                                                                                                                                                                                                                    | 22667   |
| 2                | body weight.ti,ab.                                                                                                                                                                                                                                                                                                                                                                                                                                                        | 13283   |
| 3                | BMI.ti,ab.                                                                                                                                                                                                                                                                                                                                                                                                                                                                | 10350   |
| 4                | obesity.ti,ab.                                                                                                                                                                                                                                                                                                                                                                                                                                                            | 100038  |
| 5                | overweight.ti,ab.                                                                                                                                                                                                                                                                                                                                                                                                                                                         | 22742   |
| 6                | underweight.ti,ab.                                                                                                                                                                                                                                                                                                                                                                                                                                                        | 1120    |
| 7                | 1 or 2 or 3 or 4 or 5 or 6                                                                                                                                                                                                                                                                                                                                                                                                                                                | 158528  |
| 8                | (return of spontaneous circulation or ROSC).ti,ab. or exp heart arrest/ or cardiac arrest*.ti,ab. or cardiovascular arrest*.ti,ab. or heart arrest*.ti,ab. or cardiopulmonary arrest*.ti,ab. or asystol*.ti,ab. or pulseless electrical activity.ti,ab. or exp ventricular fibrillation/ or exp advanced cardiac life support/ or (advanced cardiac life support or ACLS).ti,ab. or exp cardiopulmonary resuscitation/ or CPR.mp. or cardiopulmonary resuscitation.ti,ab. | 225563  |
| 9                | 7 and 8                                                                                                                                                                                                                                                                                                                                                                                                                                                                   | 684     |
| Medline          |                                                                                                                                                                                                                                                                                                                                                                                                                                                                           |         |
| No.              | Searches                                                                                                                                                                                                                                                                                                                                                                                                                                                                  | Results |
| 1                | body mass index.ti,ab.                                                                                                                                                                                                                                                                                                                                                                                                                                                    | 15585   |
| 2                | body weight.ti,ab.                                                                                                                                                                                                                                                                                                                                                                                                                                                        | 85251   |
| 3                | BMI.ti,ab.                                                                                                                                                                                                                                                                                                                                                                                                                                                                | 5398    |
| 4                | obesity.ti,ab.                                                                                                                                                                                                                                                                                                                                                                                                                                                            | 70263   |
| 5                | overweight.ti,ab.                                                                                                                                                                                                                                                                                                                                                                                                                                                         | 16438   |
| 6                | underweight.ti,ab.                                                                                                                                                                                                                                                                                                                                                                                                                                                        | 888     |
| 7                | 1 or 2 or 3 or 4 or 5 or 6                                                                                                                                                                                                                                                                                                                                                                                                                                                | 179224  |
| 8                | (return of spontaneous circulation or ROSC).ti,ab. or exp heart arrest/ or cardiac arrest*.ti,ab. or cardiovascular arrest*.ti,ab. or heart arrest*.ti,ab. or cardiopulmonary arrest*.ti,ab. or asystol*.ti,ab. or pulseless electrical activity.ti,ab. or exp ventricular fibrillation/ or exp advanced cardiac life support/ or (advanced cardiac life support or ACLS).ti,ab. or exp cardiopulmonary resuscitation/ or CPR.mp. or cardiopulmonary resuscitation.ti,ab. | 98574   |
| 9                | 7 and 8                                                                                                                                                                                                                                                                                                                                                                                                                                                                   | 257     |
| Cochrane library |                                                                                                                                                                                                                                                                                                                                                                                                                                                                           |         |
| No.              | Searches                                                                                                                                                                                                                                                                                                                                                                                                                                                                  | Results |
| 1                | MeSH descriptor: [Body Mass Index] explode all trees                                                                                                                                                                                                                                                                                                                                                                                                                      | 10410   |
| 2                | MeSH descriptor: [Body Weight] explode all trees                                                                                                                                                                                                                                                                                                                                                                                                                          | 29197   |
| 3                | MeSH descriptor: [Obesity] explode all trees                                                                                                                                                                                                                                                                                                                                                                                                                              | 14556   |
| 4                | MeSH descriptor: [Overweight] explode all trees                                                                                                                                                                                                                                                                                                                                                                                                                           | 17275   |
| 5                | MeSH descriptor: [Underweight] explode all trees                                                                                                                                                                                                                                                                                                                                                                                                                          | 297     |
| 6                | 1 or 2 or 3 or 4 or 5                                                                                                                                                                                                                                                                                                                                                                                                                                                     | 33853   |
| 7                | MeSH descriptor: [Return of Spontaneous Circulation] explode all trees                                                                                                                                                                                                                                                                                                                                                                                                    | 1       |
| 8                | MeSH descriptor: [Heart arrest] explode all trees                                                                                                                                                                                                                                                                                                                                                                                                                         | 2001    |
| 9                | MeSH descriptor: [Resuscitation] explode all trees                                                                                                                                                                                                                                                                                                                                                                                                                        | 5207    |
|                  | MeSH descriptor: [Advanced Cardiac Life Support] explode all trees                                                                                                                                                                                                                                                                                                                                                                                                        | 60      |
|                  | #7 or #8 or #9 or #10                                                                                                                                                                                                                                                                                                                                                                                                                                                     | 6496    |
| 15               | #6 and #11                                                                                                                                                                                                                                                                                                                                                                                                                                                                | 156     |

**Table S2.** Patients characteristics.

| Author   | N   | BMI,<br>kg/m <sup>2</sup> | Age, year        | Male<br>sex, % | Witnessed,<br>% | Bystander<br>CPR, % | Shockable<br>rhythm, % | HTN, % | DM, % | TTM, % |
|----------|-----|---------------------------|------------------|----------------|-----------------|---------------------|------------------------|--------|-------|--------|
| Aoki     | 517 | Total                     | -                | -              | -               | -                   | -                      | -      | -     | 33.8   |
|          | 68  | < 25                      | 67.3 ± 14.2      | 73             | 75              | 59                  | 1.8                    | 31     | 12    | 0      |
| Bunch    | 78  | 25-30                     | 62 ± 13.3        | 81             | 82              | 41                  | 1.7                    | 34     | 16    | 0      |
|          | 67  | > 30                      | 61.0 ± 12.5      | 81             | 92              | 46                  | 1.8                    | 38     | 30    | 0      |
|          | 6   | <18.5                     | 55.5 ± 27.2      | 50             | 33.3            | 0                   | 0                      | 16.7   | 0     | 100    |
| Chen     | 79  | 18.5-25                   | 54.0 ± 16.6      | 58.2           | 45.6            | 49.4                | 43.0                   | 40.5   | 21.5  | 100    |
|          | 88  | 25-30                     | 59.3 ± 17.9      | 71.6           | 48.9            | 36.4                | 45.5                   | 45.5   | 14.8  | 100    |
|          | 88  | >30                       | 59.6 ± 15.2      | 53.4           | 68.2            | 37.5                | 44.3                   | 58.0   | 43.2  | 100    |
| Galatian | 16  | < 25                      | 58.8 ± 12.3      | 68.75          | -               | -                   | 6.3                    | -      | -     | 0      |
| ou       | 68  | > 25                      | 59.4 ± 12.6      | 73.5           | -               | -                   | 16.2                   | -      | -     | 0      |
|          | 818 | Total                     | 60.9 (50.8-72.7) | 70.2           | 88.8            | 52.6                | 54.3                   | 44.5   | 18.3  | 100    |
|          | 27  | <18.5                     | 58.0 (45.0-77.2) | 44.4           | 81.5            | 18.5                | 33.3                   | 18.5   | 0     | 100    |
| Geri     | 377 | 18.5-25                   | 58.7 (47.7-72.7) | 68.2           | 84.9            | 40.6                | 53.6                   | 23.9   | 9.8   | 100    |
|          | 264 | 25-30                     | 60.9 (51.1-72.4) | 79.9           | 89.4            | 46.2                | 59.1                   | 36.4   | 12.5  | 100    |
|          | 150 | >30                       | 65.1 (55.9-72.6) | 62.7           | 91.3            | 43.3                | 51.3                   | 47.3   | 24.7  | 100    |
|          | 605 | Total                     | 63 (53–74)       | 69.75          | 74.21           | 51.0                | 41.88                  | 48.76  | 31.51 | 37.19  |
|          | 75  | <18.5                     | 71 (62–79)       | 70.67          | 73.33           | 52.7                | 14.86                  | 41.33  | 21.33 | 22.67  |
| Lee      | 333 | 18.5-24.9                 | 63 (54–75)       | 69.97          | 73.27           | 49.4                | 45.29                  | 46.08  | 30.72 | 36.64  |
|          | 163 | 25-29.9                   | 61 (51–72)       | 70.55          | 76.69           | 51.5                | 45.00                  | 57.41  | 37.04 | 44.17  |
|          | 34  | ≥30                       | 56.5 (42–72)     | 61.76          | 73.53           | 60.6                | 52.94                  | 50     | 35.29 | 41.18  |

**Figure S1.** Assessment of study quality.

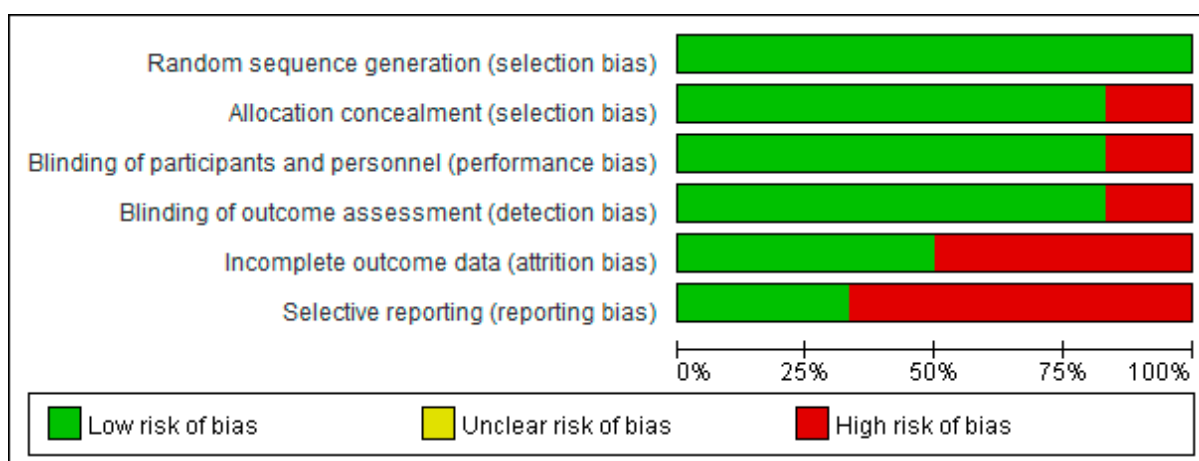

|                 | Random sequence generation (selection bias) | Allocation concealment (selection bias) | Blinding of participants and personnel (performance bias) | Blinding of outcome assessment (detection bias) | Incomplete outcome data (attrition bias) | Selective reporting (reporting bias) |
|-----------------|---------------------------------------------|-----------------------------------------|-----------------------------------------------------------|-------------------------------------------------|------------------------------------------|--------------------------------------|
| Aoki 2018       | +                                           | -                                       | -                                                         | +                                               | -                                        | -                                    |
| Bunch 2007      | +                                           | +                                       | +                                                         | +                                               | -                                        | -                                    |
| Chen 2021       | +                                           | +                                       | +                                                         | +                                               | +                                        | -                                    |
| Galatianou 2017 | +                                           | +                                       | +                                                         | -                                               | -                                        | -                                    |
| Geri 2016       | +                                           | +                                       | +                                                         | +                                               | +                                        | +                                    |
| Lee 2021        | +                                           | +                                       | +                                                         | +                                               | +                                        | +                                    |

**Figure S2.** Subgroup analysis according to quality of study for the association between body mass index categories and neurological outcomes in patients with return of spontaneous circulation after out-of-hospital cardiac arrest.

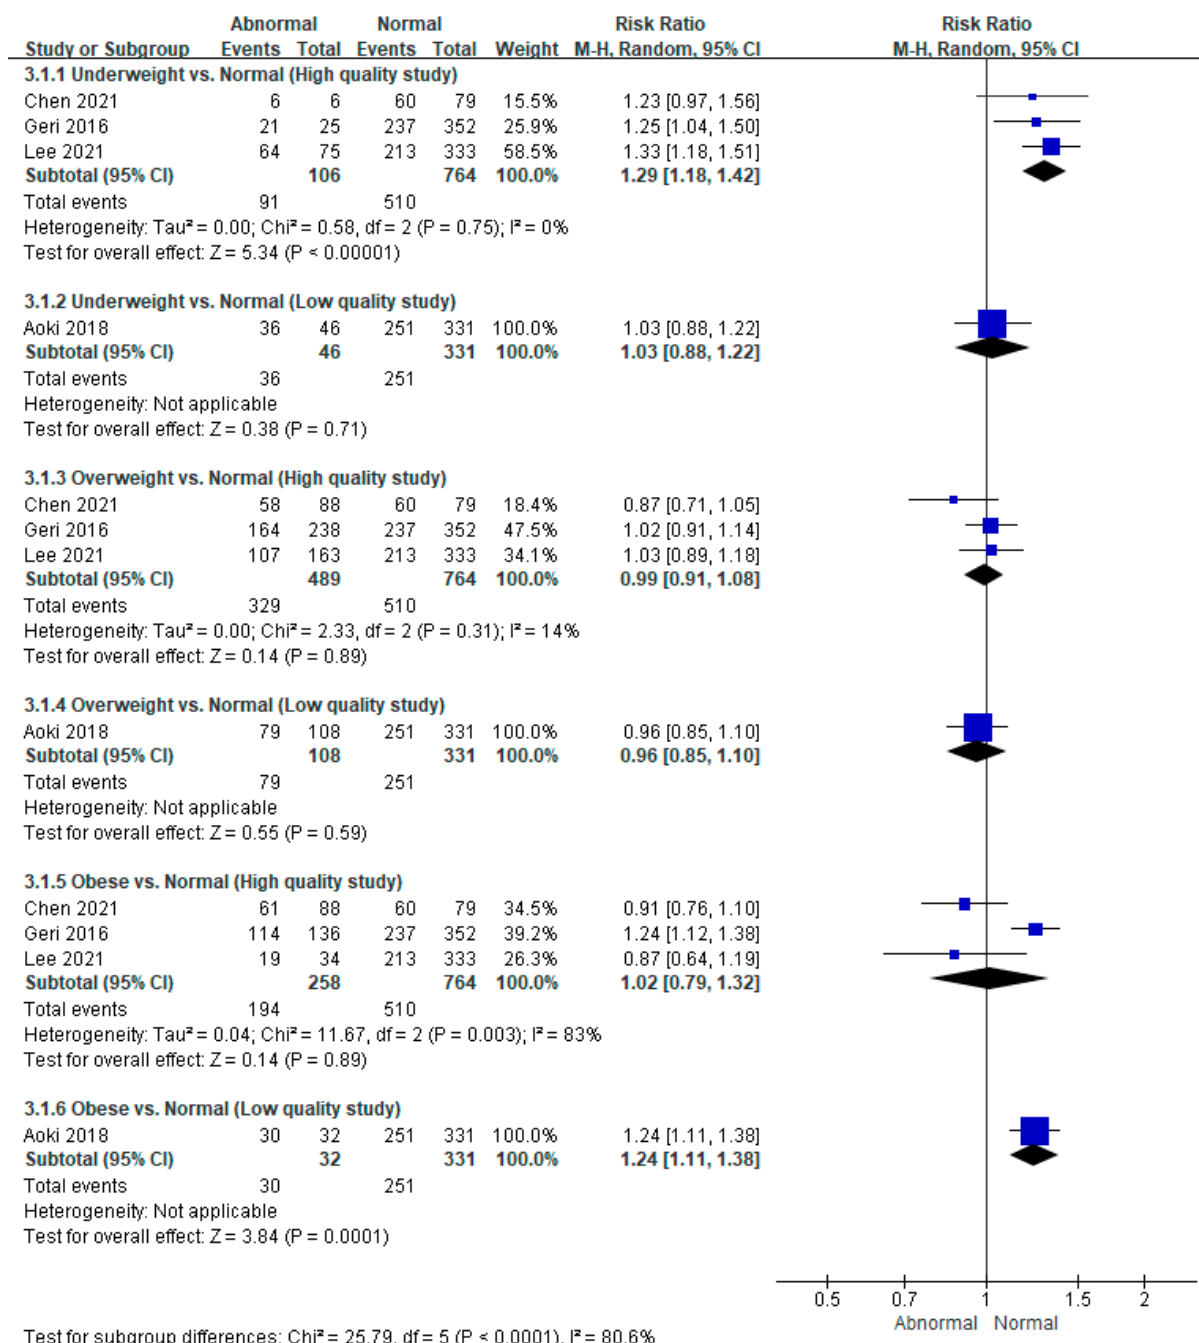

Supplement: s1 [file s1]
